# Supplementary material for: Gender disparities in advanced endoscopy fellowship
Source: PubMed Central journal article supplement — Endosc Int Open. 2021 Feb 18;9(3):E338–42. doi: 10.1055/a-1311-0899 (PMC7892265; doi:10.1055/a-1311-0899), 2021-02-18
Supplement: 2033supmat_10-1055-a-1311-0899.pdf [file 2033supmat_10-1055-a-1311-0899.pdf]

## Supplementary material

### Appendix 1. Survey administered

Q1 What is your sex?

Female

Male

Q2 How many years have you been in practice?

<5

5-9

>10

Q3 In which state do you currently practice

Q4 How many advanced endoscopy faculty are in your practice?

Q5 How many women advanced endoscopy faculty are in your practice?

Q6 Are women in the following positions in your division?

Q7 Internal Medicine Department Chair?

Yes

No

Q8 Gastroenterology Division Chief?

Yes

No

Q9 Gastroenterology Fellowship Director?

Yes

No

Q10 Endoscopy Chief?

Yes

No

Q11 How many fellows did you interview for your advanced endoscopy fellowship program in the past year?

Q12 How many female fellows did you interview for your advanced endoscopy fellowship program in the past year?

## Supplementary material

Q13 How many fellows are currently in your advanced endoscopy fellowship program?

Q14 How many female fellows are currently in your advanced endoscopy fellowship program?

Q15 How many fellows have graduated from your advanced endoscopy fellowship program in the past 10 years?

Q16 How many female fellows have graduated from your advanced endoscopy program in the past 10 years?

Q17 On average, how often do advanced endoscopy fellows take night call per week?

Once per week

Twice per week

Three times per week

More than three times per week

Q18 On average, how often do advanced endoscopy fellows take weekend call per month?

Once per month

Twice per month

Three or more times per month

## Supplementary material

Q19 Does your advanced endoscopy fellowship grant paternal or maternal leave?

Yes

No

Unsure

Q20 How important are the following as potential barriers to women pursuing advanced endoscopy?

|                                                                                           | Not at all important  | Slightly important    | Moderately important  | Very important        | Extremely important   |
|-------------------------------------------------------------------------------------------|-----------------------|-----------------------|-----------------------|-----------------------|-----------------------|
| Lack female advanced endoscopy faculty at institution of training                         | <input type="radio"/> |
| Lack of mentorship for female advanced endoscopy trainees                                 | <input type="radio"/> |
| Lack of women advanced endoscopists at national conferences or national endoscopy courses | <input type="radio"/> |
| Exposure to fluoroscopy during childbearing years                                         | <input type="radio"/> |
| Lack of formal parental/maternal leave                                                    | <input type="radio"/> |
| Perception of difficult or inflexible hours and call compared to other fields             | <input type="radio"/> |

## Supplementary material

Q30 How important are the following as potential facilitators for women pursuing a career in advanced endoscopy

|                                                                                                              | Not at important      | Slightly important    | Moderately important  | Very important        | Extremely important   |
|--------------------------------------------------------------------------------------------------------------|-----------------------|-----------------------|-----------------------|-----------------------|-----------------------|
| Increase number of female mentors                                                                            | <input type="radio"/> |
| Increase the availability of promotional events for women interested in advanced endoscopy                   | <input type="radio"/> |
| Increase the visibility of women advanced endoscopists at national meetings and endoscopy courses            | <input type="radio"/> |
| Increase the education on safe fluoroscopy practices during child bearing age                                | <input type="radio"/> |
| Increase the adoption and transparency of leave policies and duty hours during advanced endoscopy fellowship | <input type="radio"/> |
